# Supplementary material for: Remote-Management of COPD: Evaluating the Implementation of Digital Innovation to Enable Routine Care (RECEIVER): the protocol for a feasibility and service adoption observational cohort study
Source: BMJ Open Respir Res. 2021 Aug 30;8(1):e000905. doi: 10.1136/bmjresp-2021-000905 (PMC8407208; doi:10.1136/bmjresp-2021-000905)

## Supplementary material 3: RECEIVER Trial – Data Storage in NHS GG&C Azure tenancy

The working components of the COPD digital service are maintained within the NHS GG&C Lenus account. The databases containing the patient data from the Receiver trial, and the historical and contemporary control cohort data from NHS GG&C SafeHaven is maintained in a separate account, with restricted access. Planned analyses of these datasets is subject to LPAC approvals, and SafeHaven SOPs to ensure only de-identified data is shared.

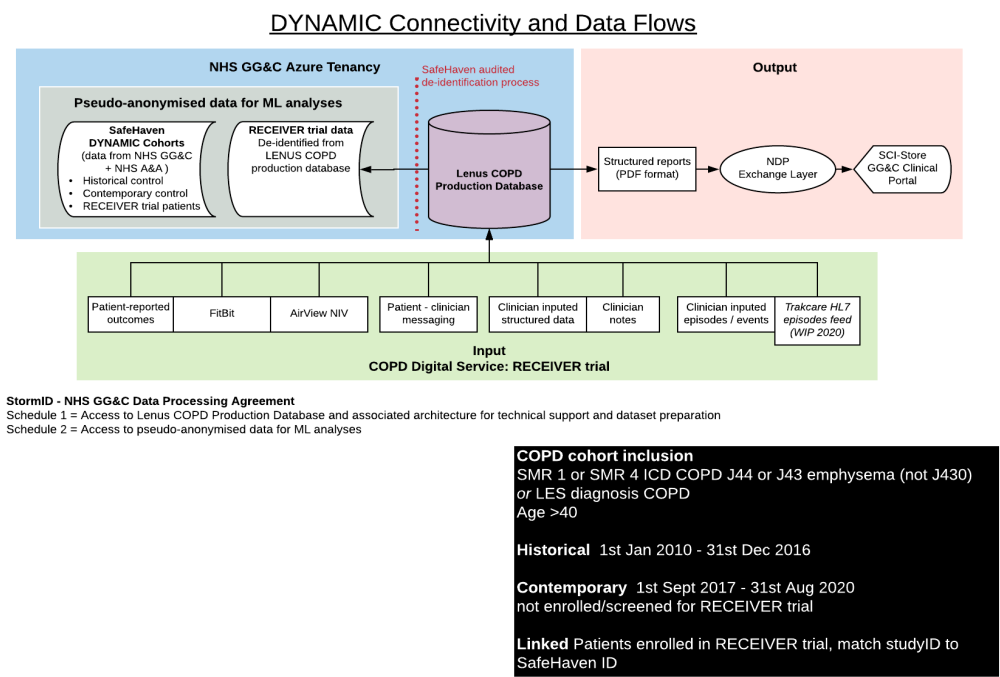

Supplement: Supplementary data [file bmjresp-2021-000905supp003.pdf]
